# Supplementary figures and images for: Membrane-bound O-acyltransferase 7 (MBOAT7) shapes lysosomal lipid homeostasis and function to control alcohol-associated liver injury
Source: eLife journal article supplement (doi:10.7554/elife.92243), 2023-12-27

Figure 2

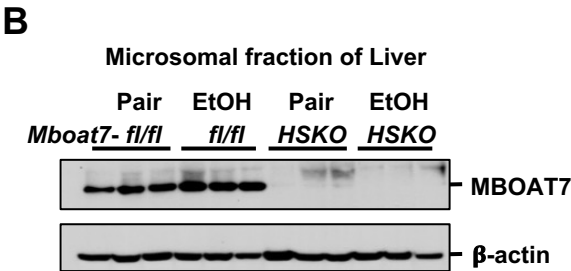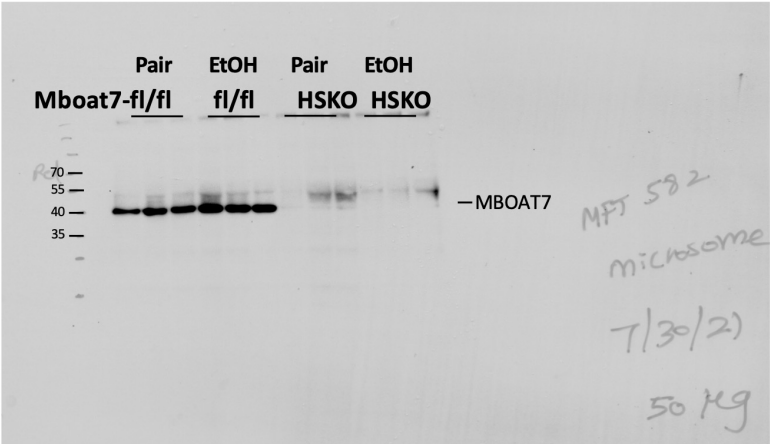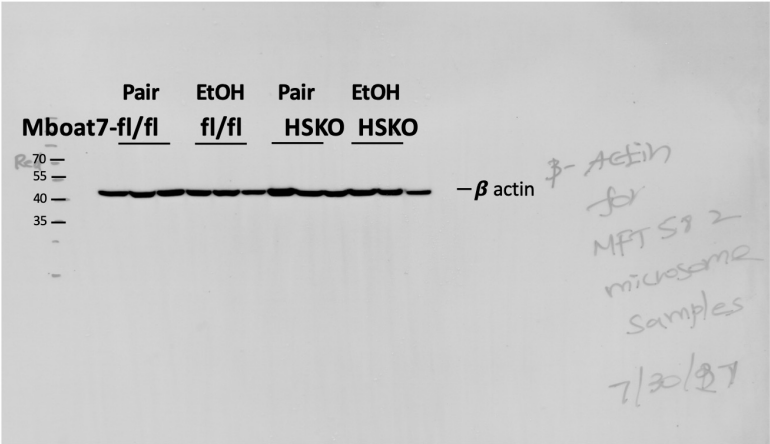

Supplement: fig2-data2 [file elife-92243-fig2-data2-v1.zip]

Figure 2-figure supplement 1

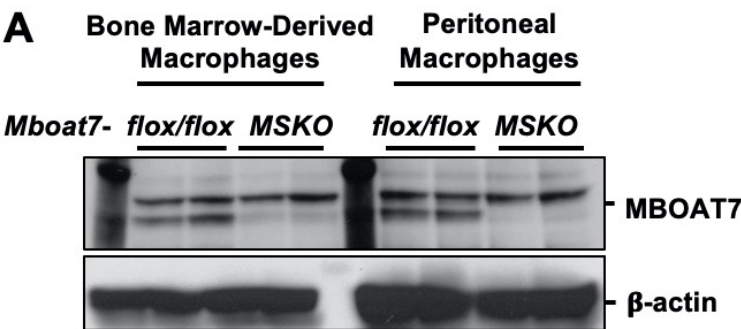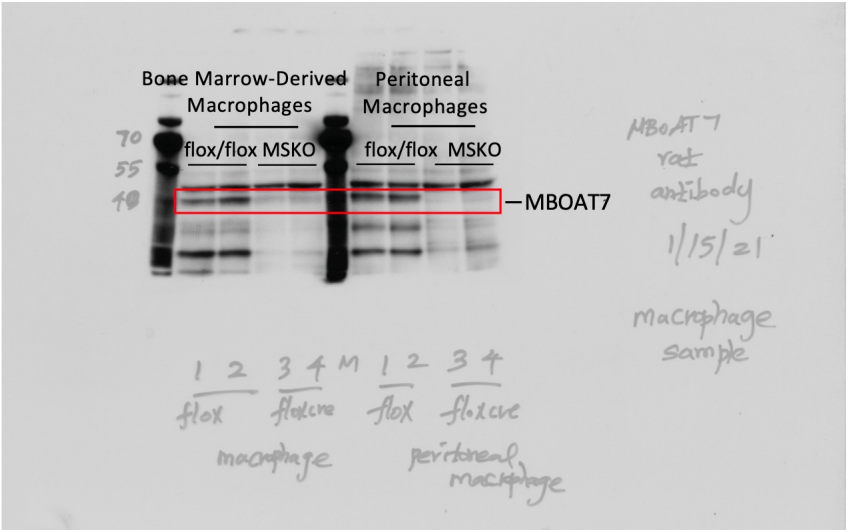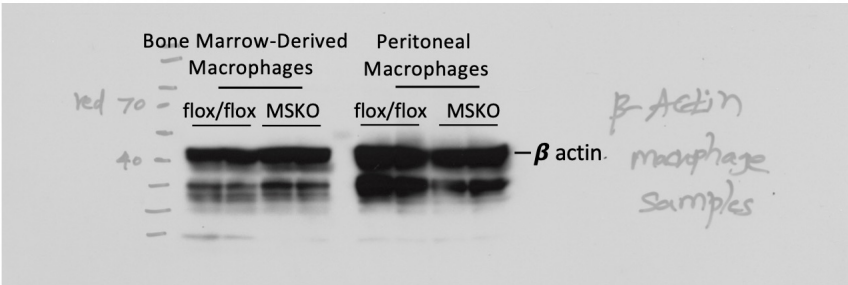

Supplement: fig2-figsupp1-data2 [file elife-92243-fig2-figsupp1-data2-v1.zip]

**Figure 4**

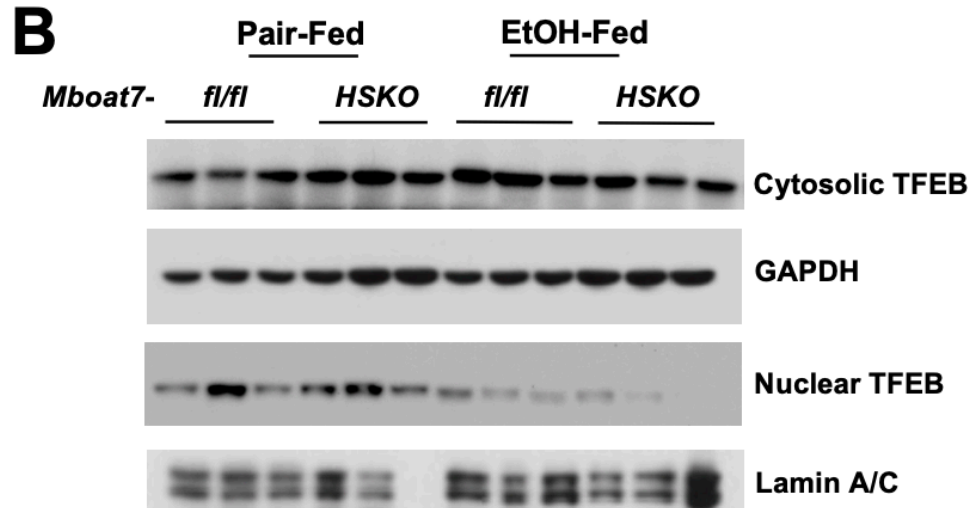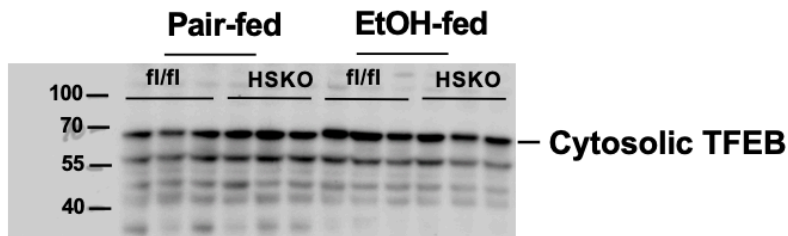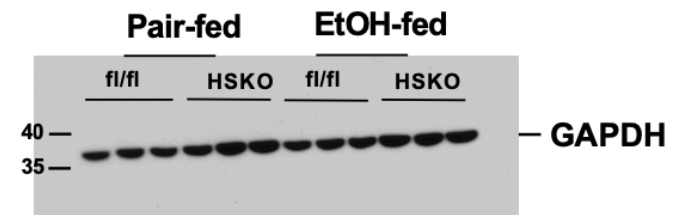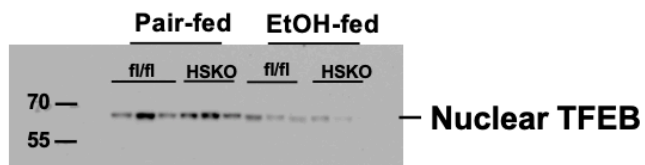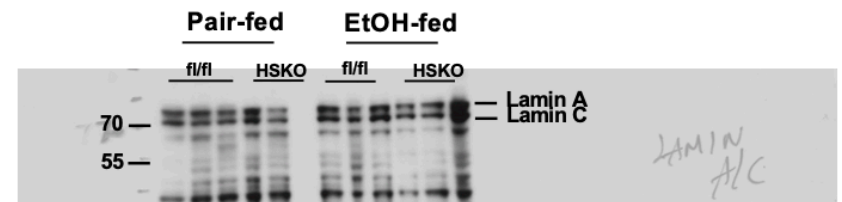

Supplement: fig4-data12 [file elife-92243-fig4-data12-v1.zip]

**A**

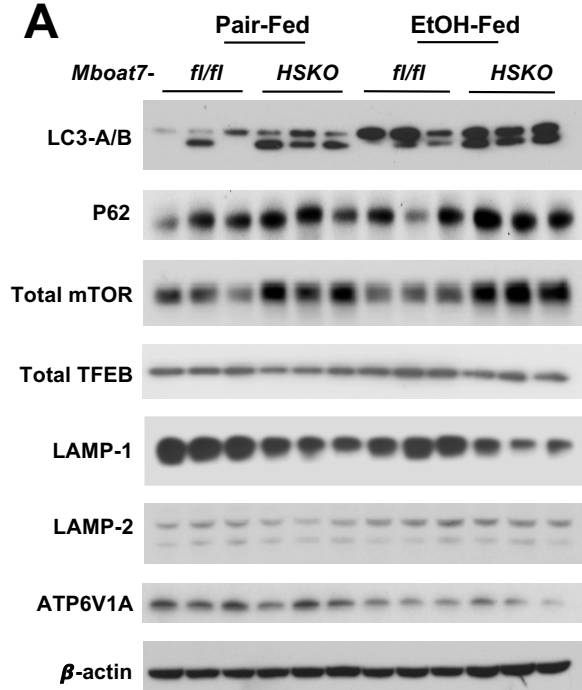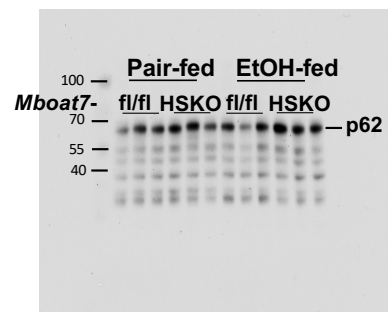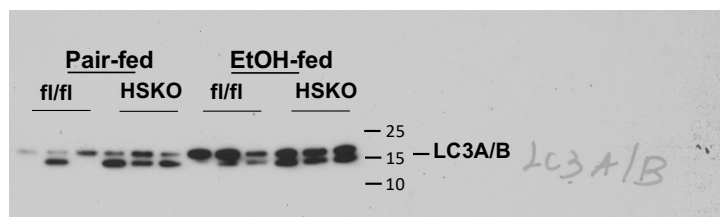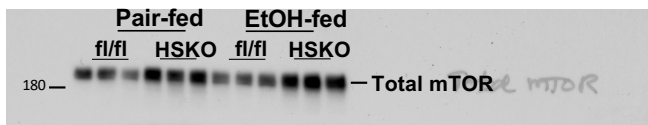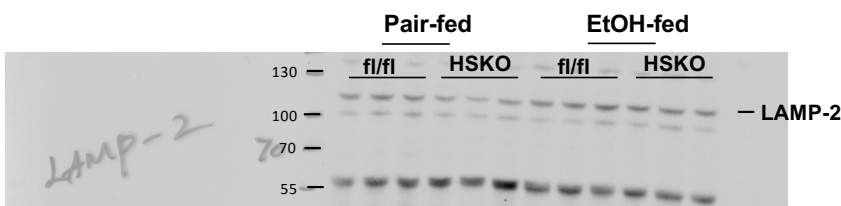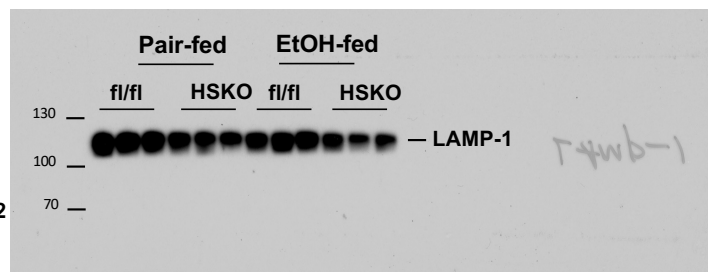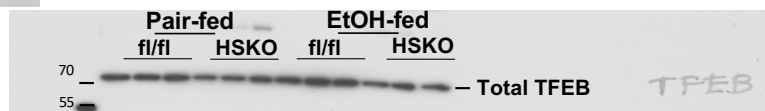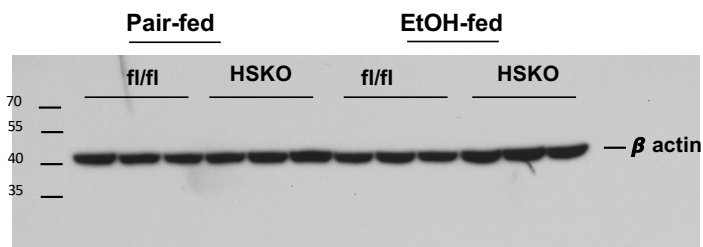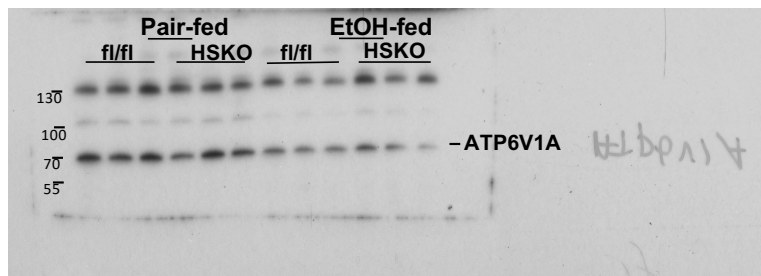

Supplement: fig4-data7 [file elife-92243-fig4-data7-v1.zip]

Figure 4-Figure Supplement 1

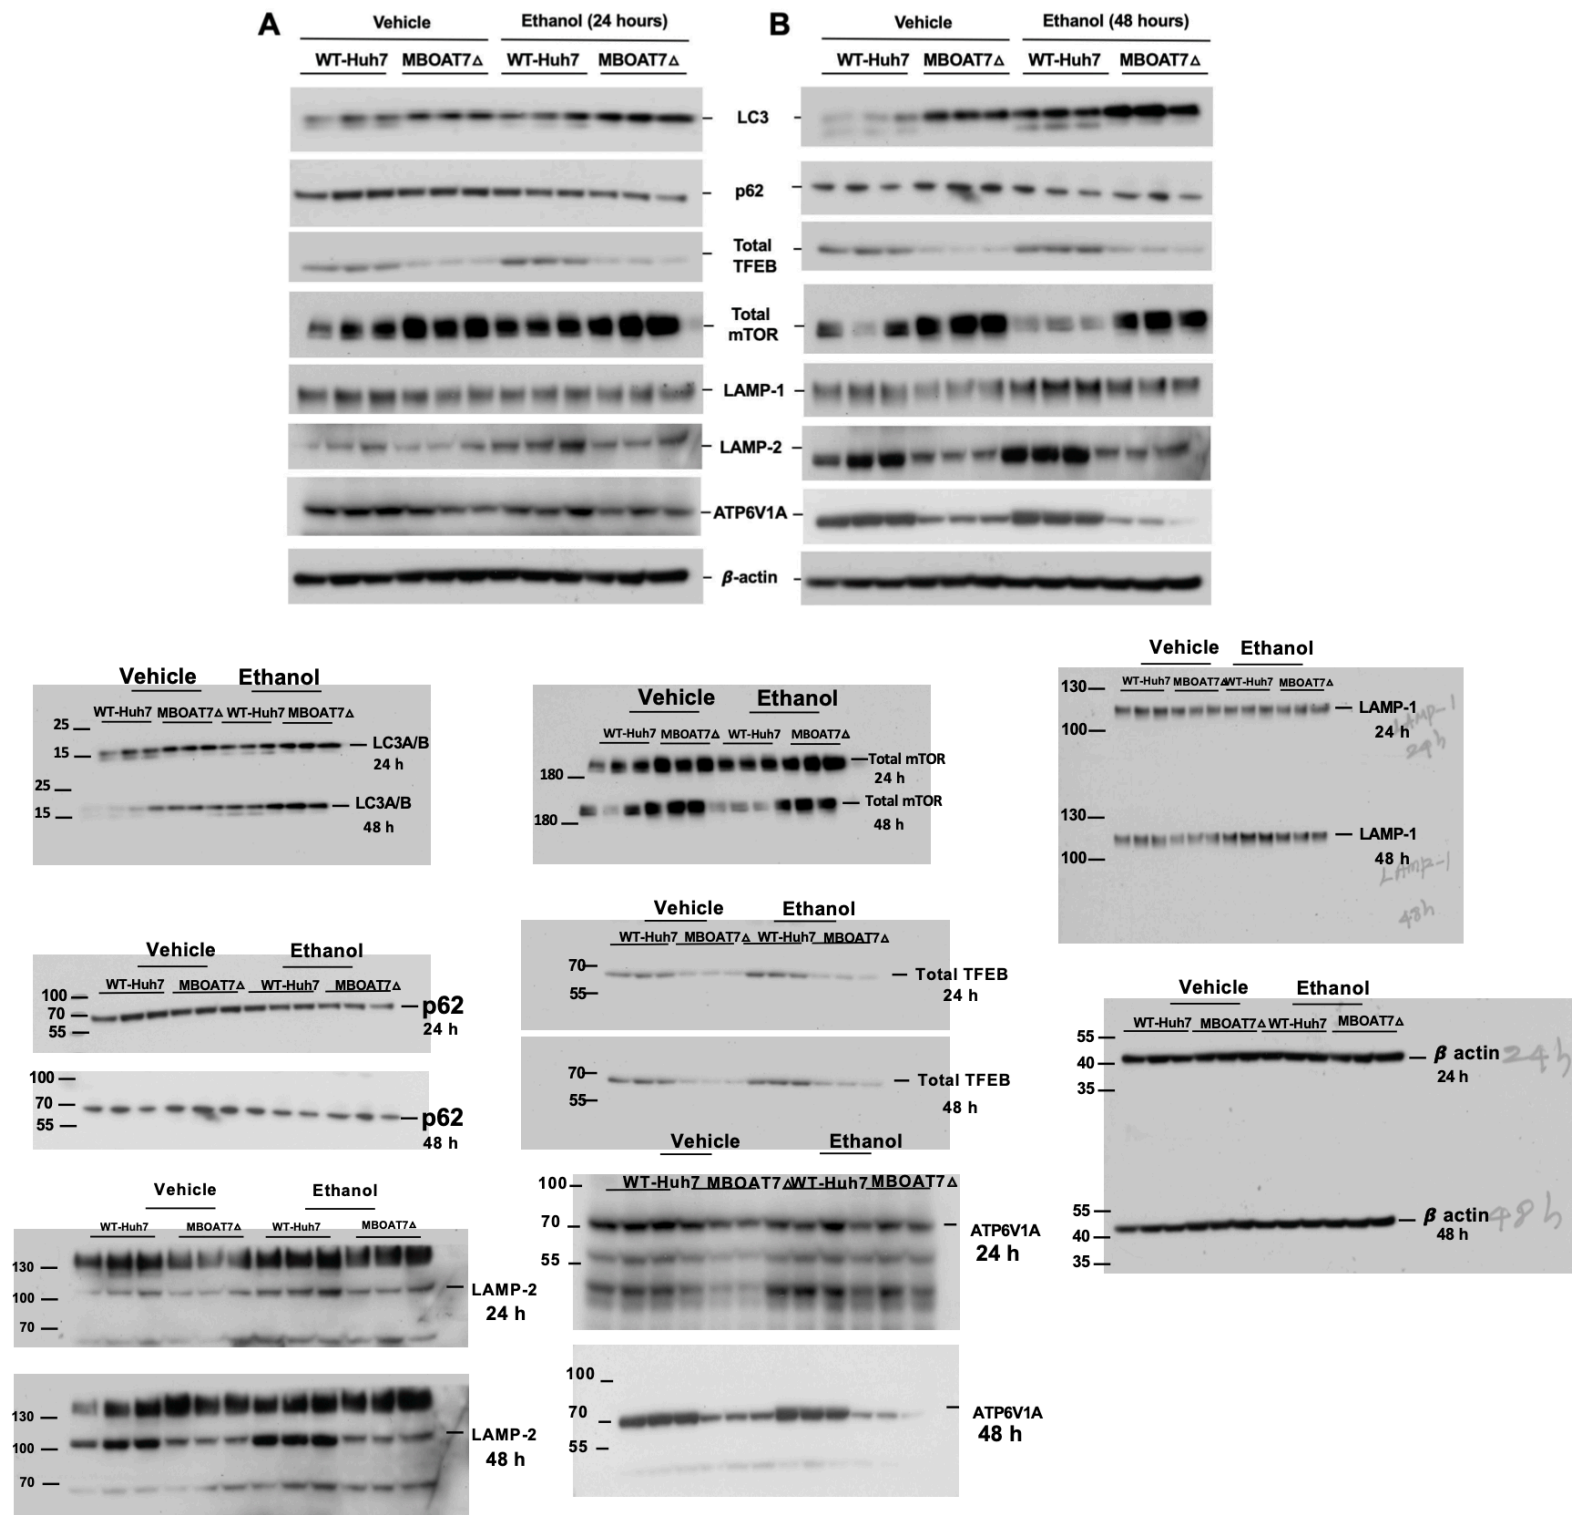

Supplement: fig4-figsupp1-data7 [file elife-92243-fig4-figsupp1-data7-v1.zip]
